# Supplementary material for: Hybrid fluorescent liquid crystalline composites: directed assembly of quantum dots in liquid crystalline block copolymer matrices
Source: Royal Society of Chemistry journal article supplement (doi:10.1039/d0ra02442b), 2020-01-01
Supplement: d0ra02442b1.pdf [file d0ra02442b1.pdf]

## Supporting Information

### Hybrid Fluorescent Liquid Crystalline Composites: Directed Assembly of Quantum Dots in Liquid Crystalline Block Copolymer Matrices

Miron Bugakov\*<sup>a</sup>, Sharifa Abdullaeva<sup>a</sup>, Pavel Samokhvalov<sup>b</sup>, Sergey Abramchuk<sup>a,c</sup>, Valery Shibaev<sup>a</sup>, and Natalia Boiko<sup>a</sup>

<sup>a</sup>*Department of Chemistry, Moscow State University, Leninskie Gory-1, 119991, Moscow, Russian Federation. E-mail: miron.bugakov@vms.chem.msu.ru.*

<sup>b</sup>*Laboratory of Nano-Bioengineering, National Research Nuclear University MEPhI (Moscow Engineering Physics Institute), 115522 Moscow, Russia*

<sup>c</sup>*Nesmeyanov Institute of Organoelement Compounds, Russian Academy of Sciences, Moscow, 119991 Russia*

\*Correspondence to: M. Bugakov, Department of Chemistry, Moscow State University, Leninskie Gory-1, 119991, Moscow, Russia. E-mail: miron.bugakov@vms.chem.msu.ru.

#### *Synthesis of macromolecular chain transfer agent, pVP<sub>120</sub>*

To obtain macromolecular chain transfer agent for triblock copolymers, pVP<sub>120</sub>, 1 g (9.53 mmol) of the as-distilled 4-vinylpyridine, 25 mg (79 μmol) of S,S'-bis(methyl-2-isobutyrate) trithiocarbonate (BMTIC), and 2.7 mg (16.3 μmol) of AIBN were placed in the ampoule; the molar ratio monomer : BMTIC : initiator was 620 : 5 : 1. The solution was poured in an ampoule and blown with argon for 20 min, and the ampoule was sealed. Polymerization was conducted for 24 h at 80°C. After completion of polymerization, the ampoule was cooled with liquid nitrogen and opened. The reaction mixture was diluted with methanol, and the polymer was lyophilized. The yield of the polymer in both cases was ~95%. According to the GPC data,  $M_n = 1.2 \times 10^4$  and  $M_w/M_n = 1.23$ .

#### *Synthesis of the triblock copolymer pVP<sub>60</sub>-b-pPhM<sub>40</sub>-b-pVP<sub>60</sub>*

To synthesize the triblock copolymer pVP<sub>60</sub>-b-pPhM<sub>40</sub>-b-pVP<sub>60</sub>, 18 μmol of pVP<sub>120</sub> (225 mg), 57 μL (38 μmol) of 4-vinylpyridine and p-(6-acryloyloxycaproyloxyphenyl)-p-methoxybenzoate (300 mg, 0.73 mmol) were dissolved in 0.35 mL of DMF. Afterwards, the calculated amount of AIBN solution in DMF was added so that the concentration of the initiator in the reaction mixture was  $8 \times 10^{-3}$  M. The reaction mixture was poured in ampoule, purged with argon and the ampoule was sealed. Polymerization was conducted at 80°C for a day. The block copolymer was isolated by precipitating the reaction mixture into excess diethyl ether. The polymerization product was purified via reprecipitation of the block copolymer from ethyl acetate solution into petroleum ether. The as-purified block copolymers were dried in vacuum at 70°C and characterized by GPC and <sup>1</sup>H NMR spectroscopy.

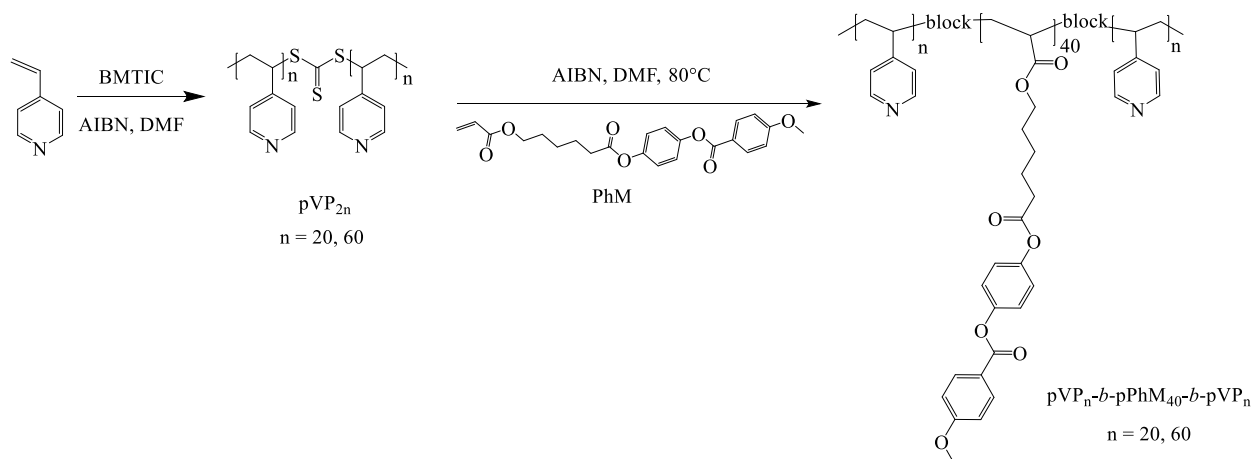

Scheme S1. Synthetic route of  $pVP_n\text{-}b\text{-pPhM}_{40}\text{-}b\text{-pVP}_n$  triblock copolymers.

## Tables

Table S1. Molecular weight data and weight fraction of mesogenic PhM units for the copolymers

| Polymer                                                        | $M_n$ | $M_w/M_n$ | $\omega(\text{PhM})^*$ |
|----------------------------------------------------------------|-------|-----------|------------------------|
| $pVP_{20}\text{-}b\text{-pPhM}_{40}\text{-}b\text{-pVP}_{20}$  | 20700 | 1.60      | 0.80                   |
| $pVP_{60}\text{-}b\text{-pPhM}_{40}\text{-}b\text{-pVP}_{60}$  | 29100 | 1.60      | 0.57                   |
| $pPhM_{20}\text{-}b\text{-pVP}_{40}\text{-}b\text{-pPhM}_{20}$ | 20600 | 1.55      | 0.80                   |
| $pVP_{120}\text{-}b\text{-pPhM}_{40}$                          | 29500 | 1.50      | 0.57                   |
| $pVP_{120}\text{-}b\text{-pPhM}_{100}$                         | 53600 | 1.50      | 0.77                   |
| $pVP_{60}\text{-}b\text{-pPhM}_{40}$                           | 22800 | 1.60      | 0.72                   |
| $p(\text{VP}_{50}\text{-}r\text{-pPhM}_{50})$                  | 25900 | 1.40      | 0.80                   |
| $p(\text{VP}_{75}\text{-}r\text{-pPhM}_{25})$                  | 33500 | 1.40      | 0.57                   |

\*Weight fraction of the PhM block.

Table S2. Phase behavior and morphology of the copolymers

| Polymer                                                                         | Glass transition temperature, °C | Phase behavior* | Microphase separation** |
|---------------------------------------------------------------------------------|----------------------------------|-----------------|-------------------------|
| pVP <sub>20</sub> - <i>b</i> -pPhM <sub>40</sub> - <i>b</i> -pVP <sub>20</sub>  | 32                               | N 110 (0.7) I   | U                       |
| pVP <sub>60</sub> - <i>b</i> -pPhM <sub>40</sub> - <i>b</i> -pVP <sub>60</sub>  | 33                               | N 111 (0.3) I   | L                       |
| pPhM <sub>20</sub> - <i>b</i> -pVP <sub>40</sub> - <i>b</i> -pPhM <sub>20</sub> | 29                               | N 91 (0.7) I    | U                       |
| pVP <sub>120</sub> - <i>b</i> -pPhM <sub>100</sub>                              | 32/144                           | N 131 (0.6) I   | C                       |
| pVP <sub>120</sub> - <i>b</i> -pPhM <sub>40</sub>                               | 33/140                           | N 118 (0.2) I   | L                       |
| pVP <sub>60</sub> - <i>b</i> -pPhM <sub>40</sub>                                | 33                               | N 121 (0.8) I   | U                       |
| p(VP <sub>50</sub> - <i>r</i> -pPhM <sub>50</sub> )                             | 51                               | -               | -                       |
| p(VP <sub>75</sub> - <i>r</i> -pPhM <sub>25</sub> )                             | 65                               | -               | -                       |

\*N – a nematic phase. I – an isotropic melt. Isotropization enthalpy (in J g<sup>-1</sup>) is given in brackets.

\*\*L – a lamellar structure, C – a cylindrical structure, and U – an unclear type of a microphase separated structure, which still contains discrete microphases formed by pVP blocks.

## Figures

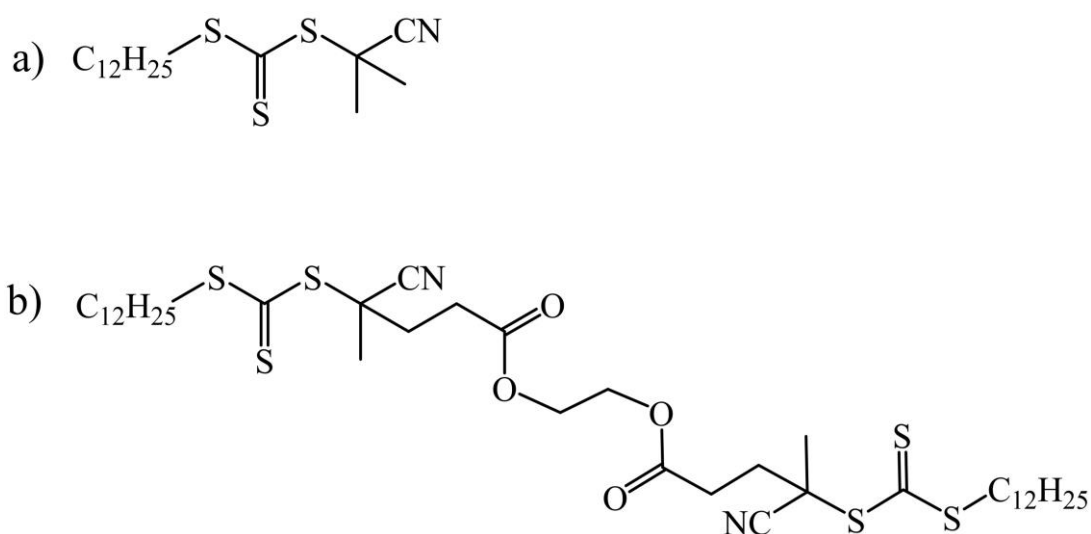

Fig. S1. Chemical structure of the (a) CPDDTC and (b) di-CPDDTC RAFT agents.

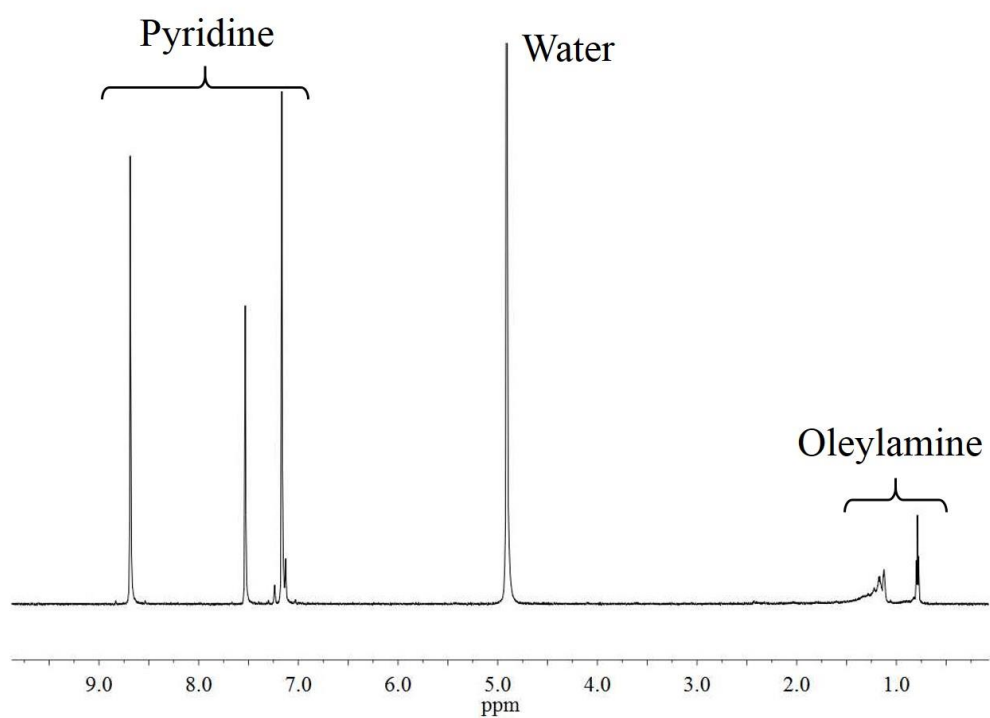

Fig. S2. <sup>1</sup>H NMR spectra of CdSe/ZnS QDs covered with pyridine in pyridine-d<sub>5</sub>. The contribution of protonated pyridine containing in pyridine-d<sub>5</sub> was subtracted.

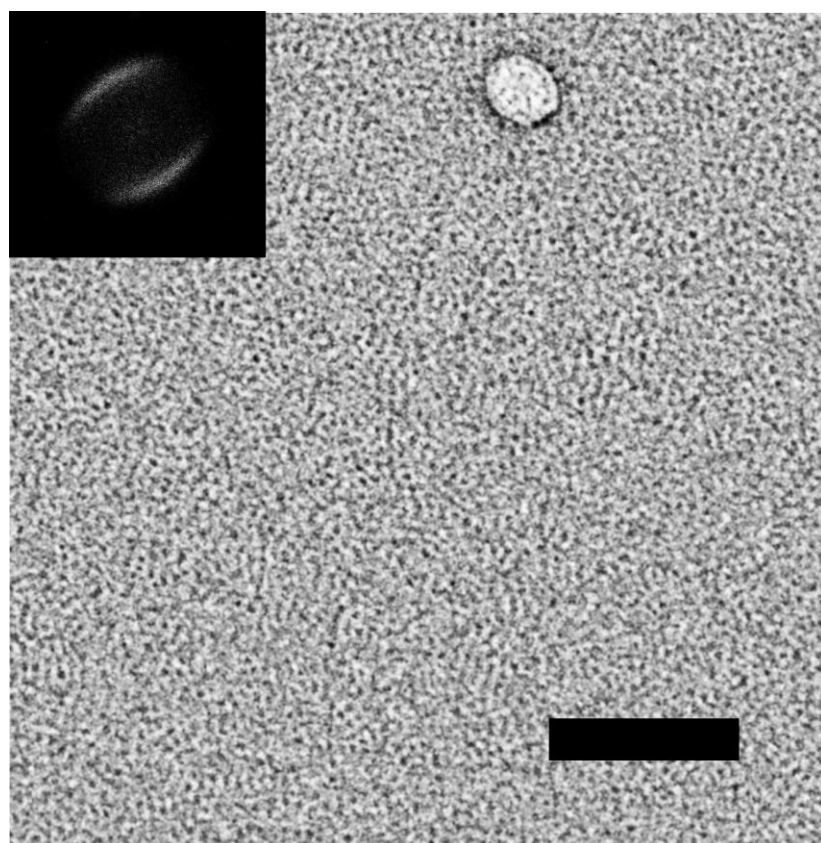

Fig. S3. TEM image of cross section of the pVP<sub>60</sub>-b-pPhM<sub>40</sub> film. The samples were annealed at 140 °C for 3 h and stained with iodine for 1 h. The insets are a corresponding FFT image. Scale bar: 200 nm.

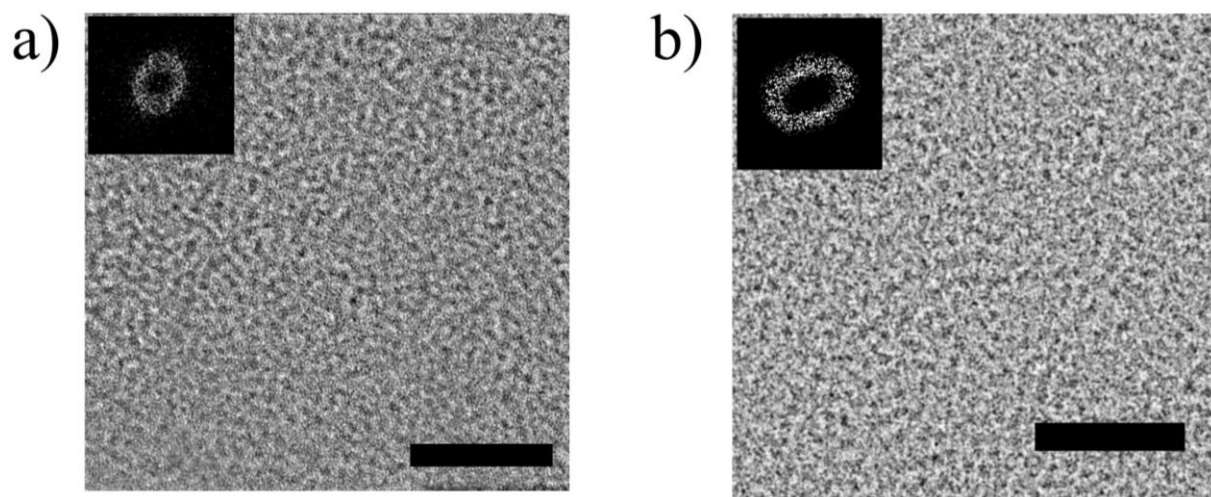

*Fig. S4. TEM images of cross sections of the (a) pVP<sub>20</sub>-b-pPhM<sub>40</sub>-b-pVP<sub>20</sub> and (b) pPhM<sub>20</sub>-b-pVP<sub>40</sub>-b-pPhM<sub>20</sub> films. The samples were annealed at 140 °C for 3 h and stained with iodine for 1 h. The insets are a corresponding FFT image. Scale bar: 100 nm.*

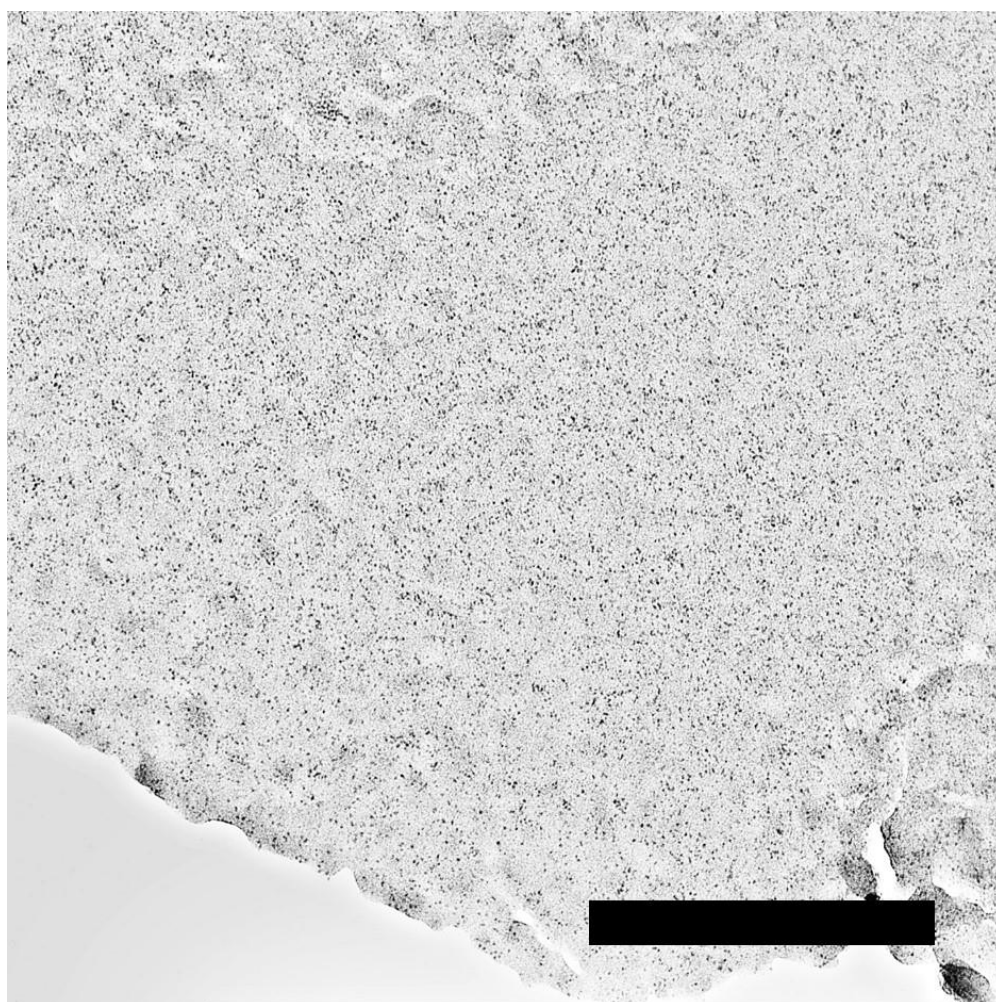

*Fig. S5. TEM image of cross section of the V<sub>60</sub>-LC<sub>40</sub>-V<sub>60</sub> film. The sample was annealed at 140 °C for 3 h. Scale bar: 500 nm.*

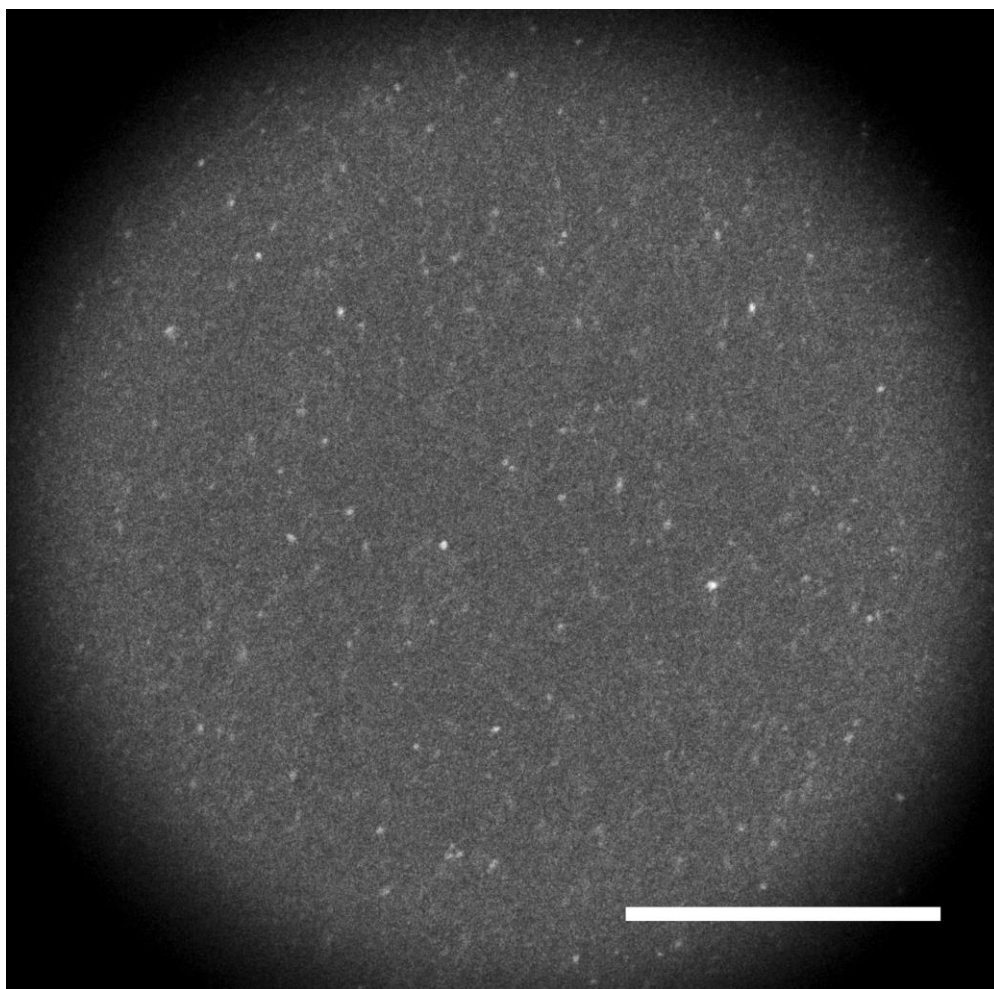

*Fig. S6. Dark field TEM image of cross section of the V<sub>60</sub>-LC<sub>40</sub>-V<sub>60</sub> film. The sample was annealed at 140 °C for 3 h. Scale bar: 200 nm.*

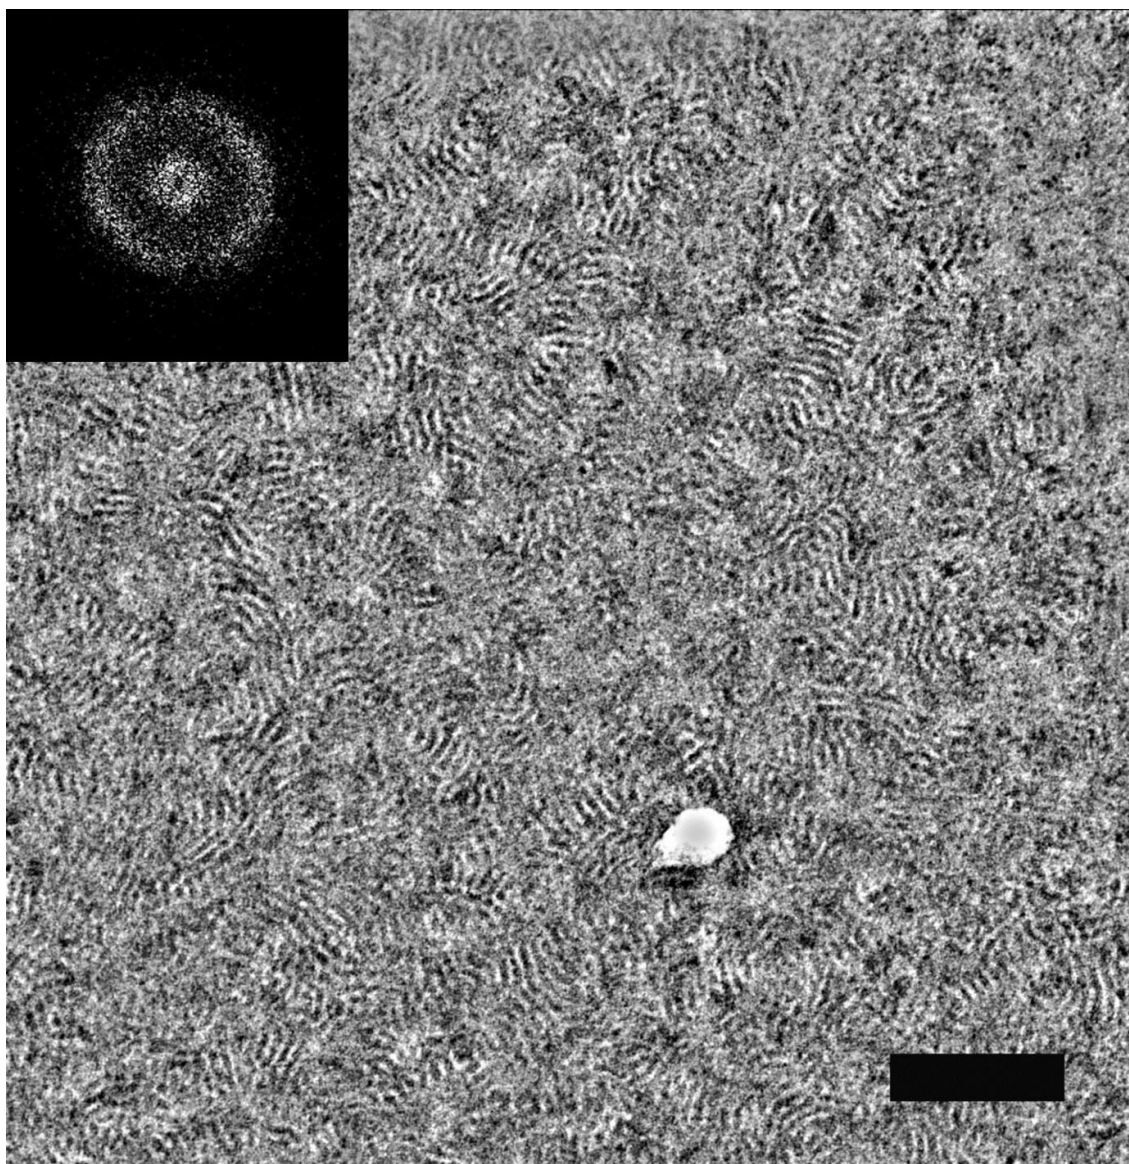

*Fig. S7. TEM image of cross section of the V<sub>60</sub>-LC<sub>40</sub>-V<sub>60</sub> film. The sample was annealed at 140 °C for 3 h and stained with iodine for 30 min. The inset is a corresponding FFT image. Scale bar: 200 nm.*

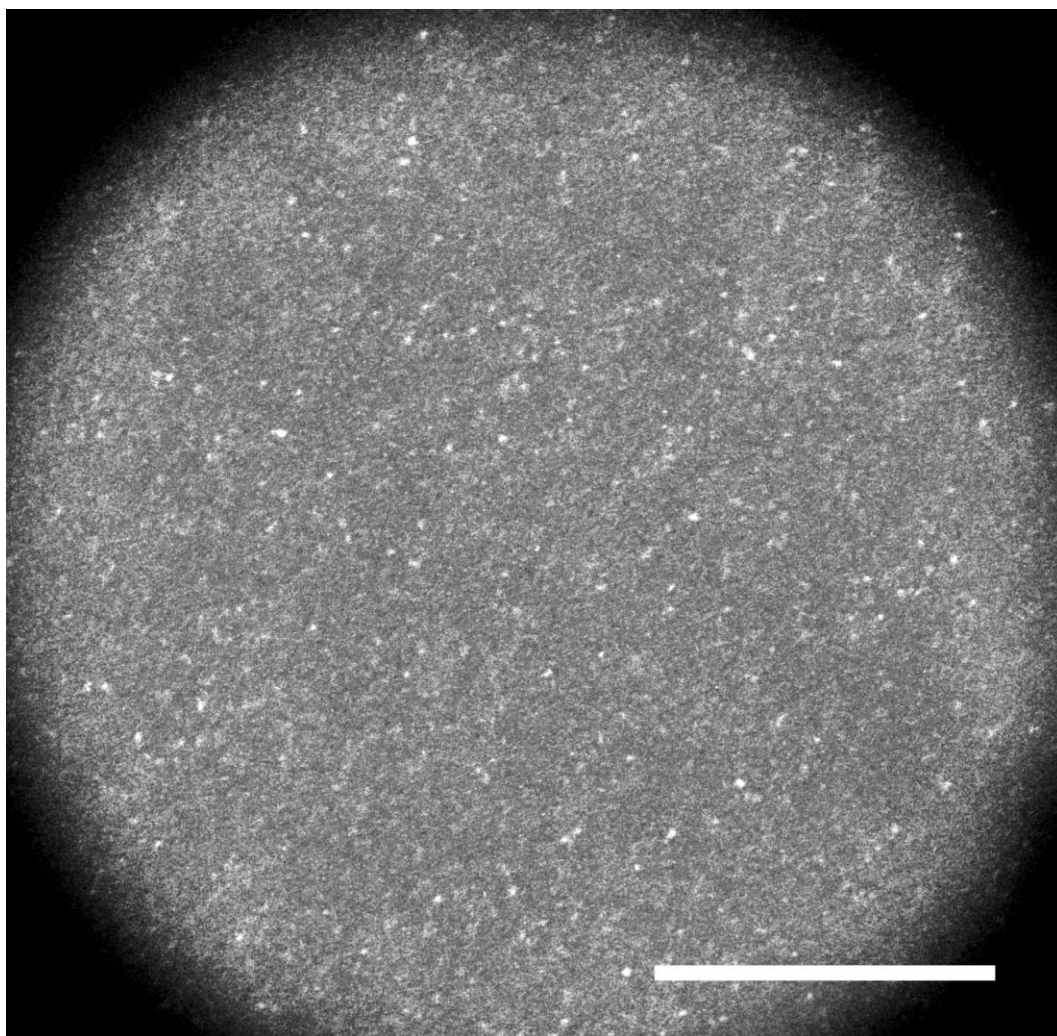

*Fig. S8. Dark field TEM image of cross section of the V<sub>120</sub>-LC<sub>40</sub> film. The sample was annealed at 140 °C for 3 h. Scale bar: 200 nm.*



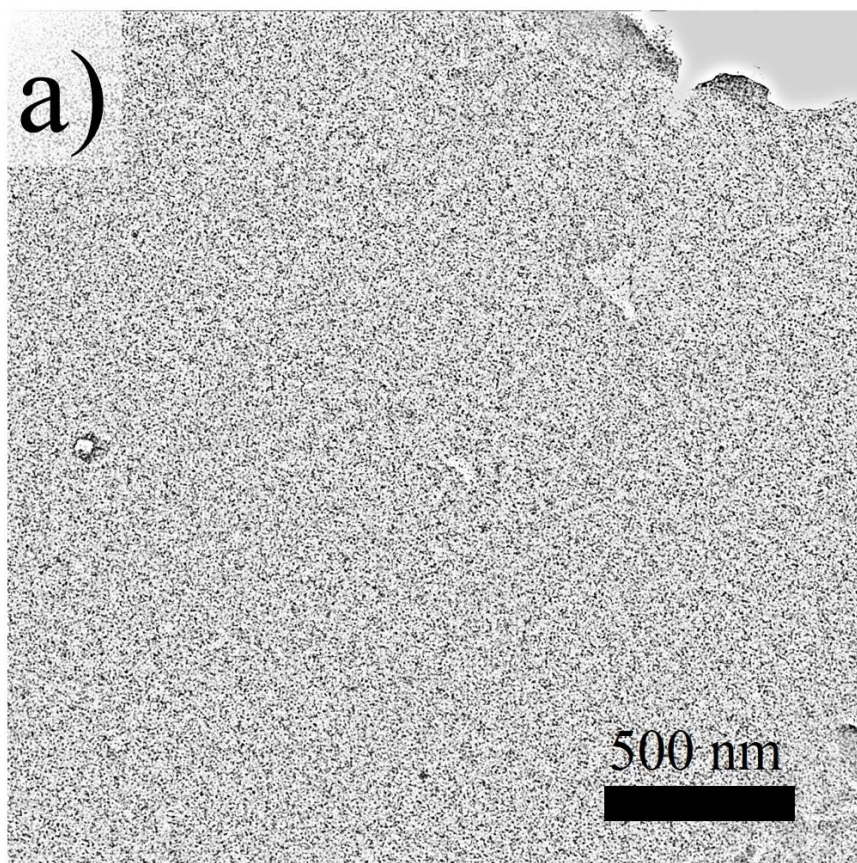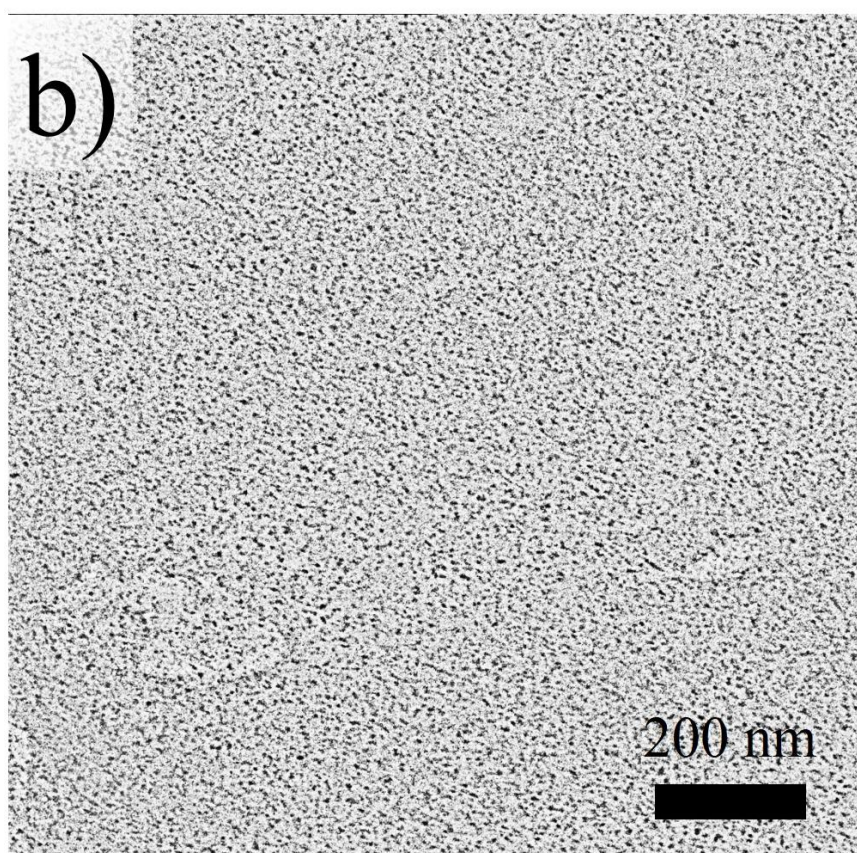

*Fig. S9. TEM images of cross sections of the (a) LC<sub>20</sub>-V<sub>60</sub>-LC<sub>20</sub> and (b) V<sub>60</sub>-LC<sub>40</sub> films. The samples were annealed at 140 °C for 3 h.*

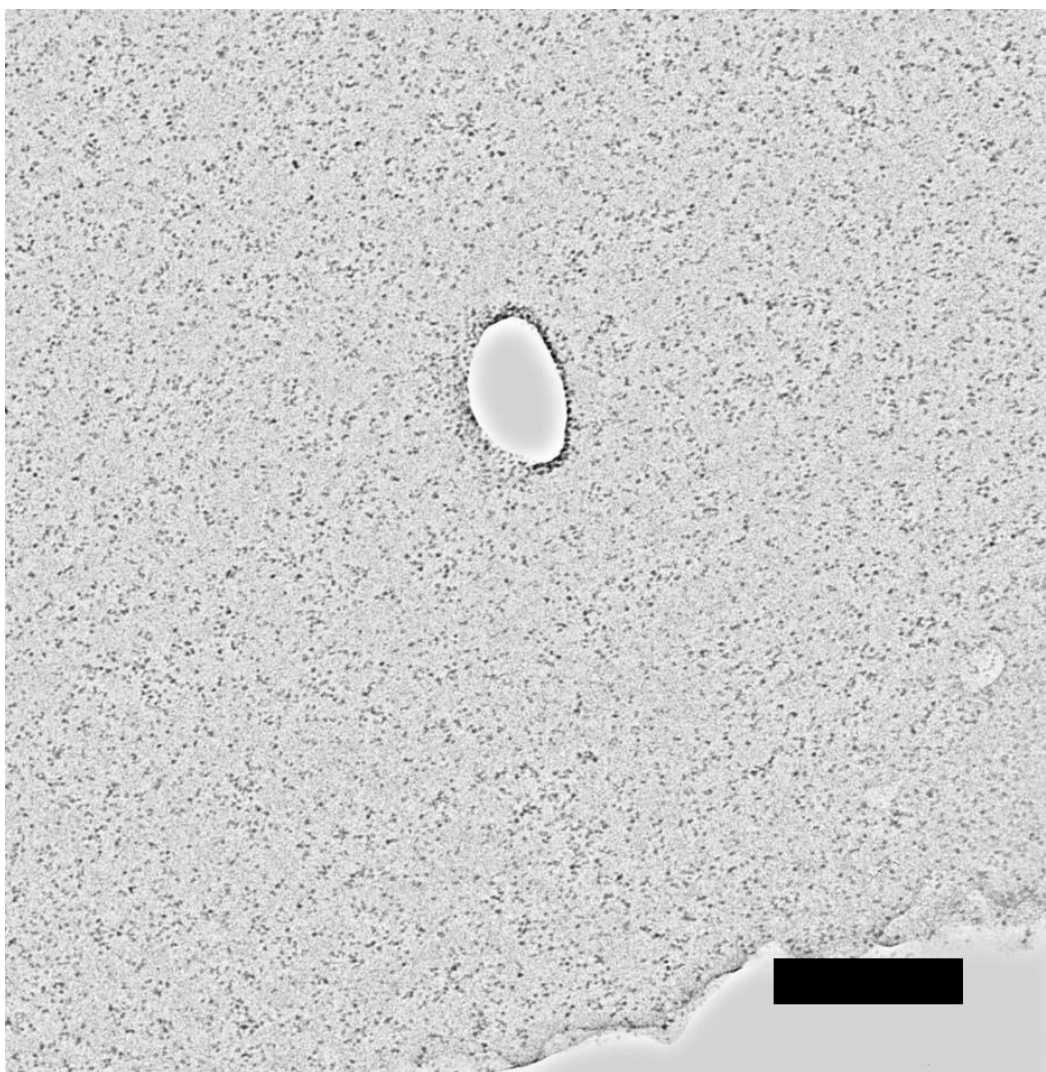

Fig. S10. TEM image of cross section of the VLC-1 film. The samples were annealed at 140 °C for 3 h.

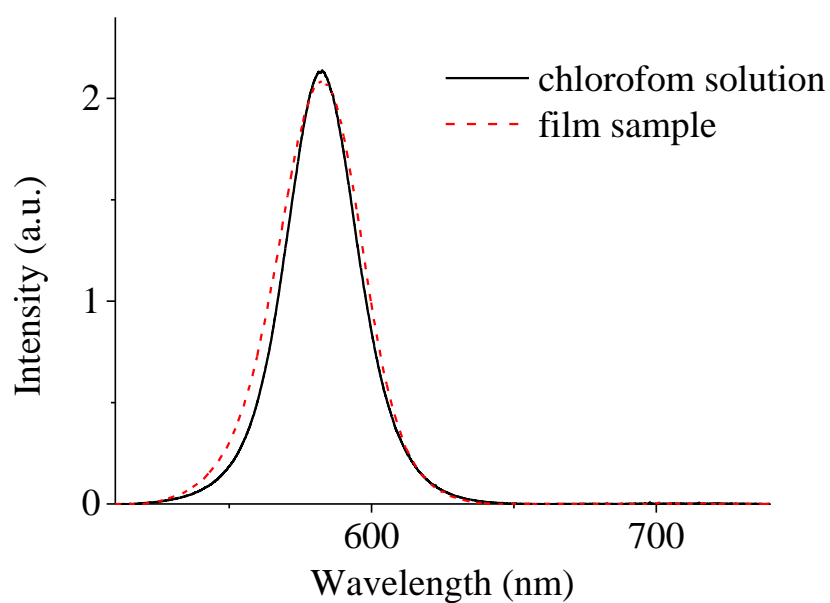

Fig. S11. Fluorescence spectra of the solution of CdSe/ZnS QDs coated with  $pVP_{60}$ - $b$ - $pPhM_{40}$ - $b$ - $pVP_{60}$  in chloroform and a film sample of  $V_{60}$ - $LC_{40}$ - $V_{60}$ .
